# Supplementary material for: Integrated Analysis of Methylation-driven Genes and Pretreatment Prognostic Factors in Patients with Hepatocellular Carcinoma
Source: Research Square preprint supplement (doi:10.21203/rs.3.rs-101415/v1), 2020-11-05
Supplement: Supplementary file 1 [file 6a4bbe8fa5efd0746361a278.docx]

**Table 1** Clinial characteristics of screened HCC patients

parameters patients，n（%）

Age (years)

<60 163 (67.1%)

>=60 80 (32.9%)

Gender

Female,n(%) 69(28.4%)

Male,n(%) 174((71.6%)

Grade

1-2,n(%) 143(58.8%)

3-4,n(%) 100（41.2%）

T grade

T1-2,n(%) 182（74.9%））

T3-4,n(%) 61（25.1%）

Risk score

Low,n(%) 123（50.6%）

High,n(%) 120（49.4%）

BMI

<24,n(%) 115（47.3%）

>=24,n(%) 128（52.7%）

Race

Asian,n(%) 126（51.9%）

Non-Asian,n(%) 117（48.1%）

Other Tumor

No,n(%) 225（92.6%）

Yes,n(%) 18（7.4%）

Cancer status

Tumor Free,n(%) 162（66.7%）

With Tumor,n(%) 81（33.4%）

HCC risk factor

No,n(%) 55（22.6%）

Yes,n(%) 188（77.4%）

Surgical method

Lobectomy,n(%) 94（38.7%）

Non-Lobectomy,n(%) 149（61.3%）

Residual tumor

R0,n(%) 230 (94.7%)

No R0,n(%) 13（5.3%）

New tumor event

No,n(%) 105（43.2%）

Yes,n(%) 138（56.8%）

**Table 2** Univariate COX regression analyses of clinicopathologic factors associated with OS

Parameters  univariate analysis P value

HR(95%CI)

T stage 2.845(1.768-4.580) <0.001

New tumor events 5.222(2.584-10.555) <0.001

Cancer status 2.460(1.519-3.982) <0.001

BMI 0.680(0.424-1.090) 0.109

Risk score 1.814(1.123-2.930) 0.015

HCC risk factors 0.737(0.437-1.243) 0.252

Surgical method 0.409(0.251-0.667) <0.001

Residual tumor 1.415(0.513-3.899) 0.502

Race 1.175(0.726-1.903) 0.512

Grade 1.130(0.670-1.825) 0.617

Gender 0.887(0.538-1.462) 0.639

Other tumor 1.150(0.496-2.668) 0.744

Age 0.933(0.567-1.536) 0.785

**Table 3** Multivariate COX regression analyses of clinicopathologic factors associated with OS

**Parameters**  Multivariate analysis P value

HR(95%CI)

T stage 2.316(1.352-3.968) 0.002

New tumor events 3.437(1.476-8.001) 0.004

Risk score 1.948(1.151-3.296) 0.013

Surgical method 0.519(0.302-0.890) 0.017
